# Supplementary material for: Characteristics, source apportionment and health risk assessment of perfluoroalkyl acids in typical drinking water sources of eastern China
Source: Royal Society of Chemistry journal article supplement (doi:10.1039/d2ew00884j), 2023-01-01
Supplement: d2ew00884j1.pdf [file d2ew00884j1.pdf]

## Supplementary Information

*for*

### **Characteristics, source apportionment and health risk assessment of perfluoroalkyl acids in typical drinking water sources of eastern China**

Hong Liu <sup>a,b</sup>, Ruibao Jia <sup>a,b,\*</sup>, Zhenqi Du <sup>c</sup>, Xiaodong Xin <sup>b</sup>, Mingquan Wang <sup>b</sup>,  
Shaohua Sun <sup>b</sup>, Weilin Guo <sup>a</sup>, Xiang Li <sup>b</sup>, Li Liu <sup>b</sup>

a School of Water Conservancy and Environment, University of Jinan, Jinan 250022,  
China

b Shandong Province City Water Supply and Drainage Water Quality Monitoring  
Center, Jinan 250101, China

c School of Environmental Sciences and Engineering, Tongji University, Shanghai  
200092, China

\* Corresponding author

E-mail: [jiaruibao1968@163.com](mailto:jiaruibao1968@163.com) (Ruibao Jia)

Address: Shandong Province City Water Supply and Drainage Water Quality  
Monitoring Center, No. Aotizhong Road, Jinan, China, 250101

Tel: + 86-531-89017607

Fax: + 86-531-89017600

## Contents

|                                                                                                                                                                                                           |    |
|-----------------------------------------------------------------------------------------------------------------------------------------------------------------------------------------------------------|----|
| <b>Table S1</b> Basic information of sampling sites.....                                                                                                                                                  | 3  |
| <b>Table S2</b> Basic water quality parameters of the samples taken.....                                                                                                                                  | 4  |
| <b>Table S3</b> Mobile phase gradient for instrumental analysis.....                                                                                                                                      | 6  |
| <b>Table S4</b> Mass spectrometric detection conditions of 17 target compounds.....                                                                                                                       | 7  |
| <b>Table S5</b> Detection frequency, recovery, ranges, average and median concentrations of PFAAs for lakes and reservoirs in Shandong Province of eastern China in the wet season and dry season.....    | 8  |
| <b>Table S6</b> Mean body weight (BW), the quantity of drinking water intake (DWI), and the acceptable daily intake of PFAAs values (ADI) for different age/gender groups in China.....                   | 10 |
| <b>Table S7</b> Total variances in PCA of PFAAs for lakes and reservoirs in Shandong Province of eastern China in the wet season.....                                                                     | 11 |
| <b>Table S8</b> Rotated factor loading matrix in PCA of PFAAs for lakes and reservoirs in Shandong Province of eastern China in the wet season and dry season.....                                        | 12 |
| <b>Table S9</b> Total variances in PCA of PFAAs for lakes and reservoirs in Shandong Province of eastern China in the dry season.....                                                                     | 13 |
| <b>Fig. S1</b> Compositions of individual PFAAs in the (A) wet season and (B) dry season and (C) concentration profiles of PFAAs in the 24 lakes and reservoirs examined.....                             | 14 |
| <b>Fig. S2</b> $RQ_{mix}$ values for $\sum$ PFAAs related to drinking water intake for male (A) and female (B) in the wet season and male (C) and female (D) in the dry season for all sampling sites.... | 15 |

**Table S1** Basic information of sampling sites

| Category                  | Site symbol | Location           | Category               | Site symbol | Location          |
|---------------------------|-------------|--------------------|------------------------|-------------|-------------------|
| ER-SNWDP lakes-reservoirs | S01         | 116.74°E, 35.08 °N | Yellow River reservoir | S13         | 117.90°E, 37.21°N |
|                           | S02         | 117.28°E, 34.65 °N |                        | S14         | 118.31°E,37.33°N  |
|                           | S03         | 116.29°E, 35.95°N  |                        | S15         | 118.69°E,37.40°N  |
|                           | S04         | 117.31°E, 36.87°N  |                        | S16         | 118.68°E,37.47°N  |
|                           | S05         | 116.80°E, 34.65°N  |                        | S17         | 118.07°E,37.40°N  |
|                           | S06         | 116.98°E, 36.77°N  |                        | S18         | 115.36°E,35.25°N  |
| Yellow River reservoir    | S07         | 117.15°E, 37.47°N  | local reservoir        | S19         | 115.55°E,35.06°N  |
|                           | S08         | 117.20°E, 37.04°N  |                        | S20         | 116.47°E,37.32°N  |
|                           | S09         | 120.05°E,36.02°N   |                        | S21         | 116.20°E, 37.30°N |
|                           | S10         | 120.25°E,36.35°N   |                        | S22         | 116.33°E,37.42°N  |
|                           | S11         | 119.08°E,36.62°N   |                        | S23         | 116.96°E,36.49°N  |
|                           | S12         | 119.40°E,36.50°N   |                        | S24         | 118.10°E, 35.68°N |

**Table S2 Basic water quality parameters of the samples taken**

| Site symbol | pH  |     | Dissolved oxygen (mg·L <sup>-1</sup> ) |      | Ammonia nitrogen (mg·L <sup>-1</sup> ) |       | Chloride (mg·L <sup>-1</sup> ) |      | Sulfate (mg·L <sup>-1</sup> ) |     | COD (mg·L <sup>-1</sup> ) |     |
|-------------|-----|-----|----------------------------------------|------|----------------------------------------|-------|--------------------------------|------|-------------------------------|-----|---------------------------|-----|
|             | Wet | Dry | Wet                                    | Dry  | Wet                                    | Dry   | Wet                            | Dry  | Wet                           | Dry | Wet                       | Dry |
| S01         | 8.3 | 8.6 | 7.3                                    | 10.0 | 0.22                                   | 0.29  | 405                            | 153  | 336                           | 214 | 29                        | 36  |
| S02         | 8.6 | 8.8 | 7.8                                    | 9.8  | 0.20                                   | 0.17  | 632                            | 106  | 255                           | 172 | 27                        | 26  |
| S03         | 7.8 | 8.2 | 5.3                                    | 12.3 | 0.29                                   | 0.10  | 132                            | 146  | 146                           | 222 | 11                        | 16  |
| S04         | 8.2 | 8.2 | 10.4                                   | 9.3  | 0.07                                   | 0.03  | 111                            | 107  | 179                           | 180 | 14                        | 16  |
| S05         | 8.3 | 8.2 | 8.2                                    | 10.3 | 0.05                                   | 0.05  | 100                            | 73.2 | 174                           | 128 | 11                        | 11  |
| S06         | 8.3 | 8.2 | 9.1                                    | 10.3 | <0.03                                  | <0.03 | 81.5                           | 57.1 | 146                           | 118 | 10                        | 11  |
| S07         | 8.4 | 8.3 | 8.2                                    | 9.3  | <0.03                                  | <0.03 | 134                            | 121  | 193                           | 188 | 12                        | 10  |
| S08         | 8.3 | 8.4 | 8.6                                    | 9.9  | 0.03                                   | 0.04  | 81.4                           | 55.0 | 148                           | 113 | 19                        | 10  |
| S09         | 8.2 | 8.3 | 10.0                                   | 12.2 | 0.08                                   | 0.10  | 48                             | 52   | 41                            | 63  | 15                        | 21  |
| S10         | 7.7 | 8.2 | 9.6                                    | 12.9 | 0.08                                   | 0.04  | 126                            | 164  | 128                           | 150 | 12                        | 20  |
| S11         | 7.8 | 8.2 | 9.1                                    | 12.8 | 0.13                                   | 0.15  | 85                             | 91.4 | 108                           | 119 | 11                        | 14  |
| S12         | 7.9 | 8.3 | 11.8                                   | 13.1 | 0.13                                   | 0.16  | 156                            | 152  | 100                           | 102 | 14                        | 20  |
| S13         | 7.6 | 8.3 | 10.0                                   | 13.2 | 0.14                                   | 0.16  | 99                             | 92.5 | 100                           | 150 | 8                         | 12  |
| S14         | 7.8 | 8.2 | 8.8                                    | 12.4 | 0.06                                   | 0.08  | 170                            | 89   | 153                           | 129 | 10                        | 14  |
| S15         | 7.3 | 8.2 | 8.6                                    | 12.4 | 0.05                                   | 0.05  | 96                             | 208  | 164                           | 138 | 5                         | 12  |
| S16         | 7.4 | 8.1 | 7.9                                    | 10.1 | 0.06                                   | 0.07  | 115                            | 266  | 156                           | 182 | 14                        | 14  |
| S17         | 7.9 | 8.2 | 9.7                                    | 11.6 | 0.05                                   | 0.07  | 117                            | 84.6 | 149                           | 122 | 12                        | 18  |
| S18         | 7.7 | 7.5 | 10.5                                   | 12.6 | 0.07                                   | 0.07  | 102                            | 82.8 | 128                           | 126 | 12                        | 12  |
| S19         | 7.7 | 8.2 | 10.5                                   | 11.8 | 0.07                                   | 0.06  | 172                            | 156  | 154                           | 180 | 8                         | 20  |
| S20         | 7.3 | 8.4 | 9.0                                    | 13.2 | 0.05                                   | 0.07  | 42                             | 91.4 | 207                           | 168 | 10                        | 14  |
| S21         | 7.3 | 8.2 | 8.7                                    | 13.3 | 0.05                                   | 0.09  | 98                             | 200  | 240                           | 314 | 14                        | 15  |

|     |     |     |      |      |      |       |      |      |     |     |    |    |
|-----|-----|-----|------|------|------|-------|------|------|-----|-----|----|----|
| S22 | 7.3 | 8.4 | 9.0  | 14.1 | 0.05 | 0.09  | 7.80 | 90.7 | 131 | 140 | 6  | 14 |
| S23 | 8.3 | 8.1 | 8.9  | 9.1  | 0.12 | <0.03 | 15.3 | 17.6 | 76  | 84  | 10 | 9  |
| S24 | 7.8 | 8.9 | 10.0 | 12.0 | 0.08 | 0.07  | 20   | 21   | 89  | 96  | 11 | 12 |

---

Note: Wet represents the wet season. Dry represents the dry season.

**Table S3** Mobile phase gradient for instrumental analysis

| Time/mi | %A | %B |
|---------|----|----|
| Initial | 65 | 35 |
| 1       | 50 | 50 |
| 6       | 30 | 70 |
| 7       | 10 | 90 |
| 8.5     | 10 | 90 |
| 8.51    | 65 | 35 |
| 10      | 65 | 35 |

**Table S4** Mass spectrometric detection conditions of 17 target compounds

| Target compounds | Retention time/min | Ion pair | Cone voltage/V | Collision energy/eV |
|------------------|--------------------|----------|----------------|---------------------|
| PFBA             | 3.10               | 213/125  | 14             | 12                  |
|                  |                    | 213/169* | 14             | 10                  |
| PFPeA            | 4.71               | 263/141  | 14             | 10                  |
|                  |                    | 263/219* | 14             | 10                  |
| PFHxA            | 6.04               | 313/119  | 14             | 20                  |
|                  |                    | 313/269* | 14             | 10                  |
| PFHpA            | 7.34               | 363/169  | 14             | 18                  |
|                  |                    | 363/319* | 14             | 10                  |
| PFOA             | 8.54               | 413/169  | 14             | 18                  |
|                  |                    | 413/369* | 14             | 10                  |
| PFNA             | 9.47               | 463/169  | 16             | 20                  |
|                  |                    | 463/419* | 16             | 10                  |
| PFDA             | 9.91               | 513/169  | 16             | 26                  |
|                  |                    | 513/469* | 16             | 10                  |
| PFUnDA           | 10.19              | 563/169  | 16             | 26                  |
|                  |                    | 563/519* | 16             | 11                  |
| PFDoDA           | 10.43              | 613/169  | 16             | 28                  |
|                  |                    | 613/569* | 16             | 12                  |
| PFTrDA           | 10.67              | 663/169  | 16             | 32                  |
|                  |                    | 663/619* | 16             | 12                  |
| PFTeDA           | 10.94              | 713/169  | 16             | 34                  |
|                  |                    | 713/669* | 16             | 12                  |
| PFHxDA           | 10.07              | 813/169  | 30             | 34                  |
|                  |                    | 813/769* | 30             | 12                  |
| PFoDA            | 10.31              | 913/169  | 20             | 34                  |
|                  |                    | 913/869* | 20             | 15                  |
| PFDS             | 10.19              | 599/80   | 70             | 50                  |
|                  |                    | 599/99*  | 70             | 34                  |
| PFOS             | 9.55               | 499/80   | 60             | 32                  |
|                  |                    | 499/99*  | 60             | 30                  |
| PFHxS            | 7.62               | 399/80   | 60             | 32                  |
|                  |                    | 399/99*  | 60             | 30                  |
| PFBS             | 5.13               | 299/80   | 45             | 30                  |
|                  |                    | 299/99*  | 45             | 28                  |

Note: \* represents quantitative ion.

**Table S5** Detection frequency, recovery, ranges, average and median concentrations of PFAAs for lakes and reservoirs in Shandong Province of eastern China in the wet season and dry season

| Target compounds | The wet season              |                            |                              |               | The dry season              |                            |                              |               | MDL (ng·L <sup>-1</sup> ) |
|------------------|-----------------------------|----------------------------|------------------------------|---------------|-----------------------------|----------------------------|------------------------------|---------------|---------------------------|
|                  | Range (ng·L <sup>-1</sup> ) | Mean (ng·L <sup>-1</sup> ) | Median (ng·L <sup>-1</sup> ) | DF (%)        | Range (ng·L <sup>-1</sup> ) | Mean (ng·L <sup>-1</sup> ) | Median (ng·L <sup>-1</sup> ) | DF (%)        |                           |
| PFBA             | ND                          | /                          | /                            | 0/24 (0)      | ND                          | /                          | /                            | 0/24 (0)      | 1.0                       |
| PFPeA            | ND                          | /                          | /                            | 0/24 (0)      | ND                          | /                          | /                            | 0/24 (0)      | 1.0                       |
| PFHxA            | ND~18.0                     | 6.5                        | 5.0                          | 8/24 (33.3%)  | ND~2.1                      | 1.4                        | 1.4                          | 11/24 (45.8%) | 0.5                       |
| PFHpA            | ND~9.0                      | 3.6                        | 3.0                          | 10/24 (41.7%) | ND~2.4                      | 1.0                        | 0.9                          | 15/24 (62.5%) | 0.3                       |
| PFOA             | 0.9~92.7                    | 21.9                       | 6.9                          | 24/24 (100%)  | 1.9~37.6                    | 13.2                       | 8.8                          | 24/24 (100%)  | 0.5                       |
| PFNA             | ND~2.1                      | 1.0                        | 1.0                          | 13/24 (54.2%) | ND~0.95                     | 0.3                        | 0.23                         | 17/24 (70.8%) | 0.1                       |
| PFDA             | ND                          | /                          | /                            | 0/24 (0)      | ND                          | /                          | /                            | 0/24 (0)      | 0.5                       |
| PFUnDA           | ND                          | /                          | /                            | 0/24 (0)      | ND                          | /                          | /                            | 0/24 (0)      | 1.0                       |
| PFDoDA           | ND                          | /                          | /                            | 0/24 (0)      | ND                          | /                          | /                            | 0/24 (0)      | 1.0                       |
| PFTTrDA          | ND                          | /                          | /                            | 0/24 (0)      | ND                          | /                          | /                            | 0/24 (0)      | 1.0                       |
| PFTeDA           | ND                          | /                          | /                            | 0/24 (0)      | ND                          | /                          | /                            | 0/24 (0)      | 2.0                       |
| PFHxDA           | ND                          | /                          | /                            | 0/24 (0)      | ND                          | /                          | /                            | 0/24 (0)      | 1.0                       |
| PFODA            | ND                          | /                          | /                            | 0/24 (0)      | ND                          | /                          | /                            | 0/24 (0)      | 1.0                       |



|    |       |        |     |     |                    |        |      |      |                    |     |             |
|----|-------|--------|-----|-----|--------------------|--------|------|------|--------------------|-----|-------------|
| 1. | PFDS  | ND     | /   | /   | (0)<br>0/24<br>(0) | ND     | /    | /    | (0)<br>0/24<br>(0) | 1.0 | Note:<br>DF |
| =  | PFOS  | ND~3.0 | 2.2 | 2.0 | 5/24<br>(20.8%)    | ND~1.2 | 0.8  | 0.7  | 8/24<br>(33.3%)    | 0.5 |             |
|    | PFHxS | ND~4.0 | 2.0 | 2.0 | 10/24<br>(41.7%)   | ND~1.7 | 0.6  | 0.5  | 10/24<br>(41.7%)   | 0.3 |             |
|    | PFBS  | ND~4.0 | 2.8 | 2.5 | 8/24<br>(33.3%)    | ND~2.8 | 0.75 | 0.75 | 18/24<br>(75%)     | 0.3 |             |

detection frequency; SD = standard deviation; ND = not detected.

2. The mean and median values were calculated based on the concentration detected by individual PFAA.

**Table S6** Mean body weight (BW), the quantity of drinking water intake (DWI), and the acceptable daily intake of PFAAs values (ADI) for different age/gender groups in China

| Age group | Gender | BW/kg <sup>1</sup> | DWI/L·d <sup>-1 2</sup> | ADI/ng·kg <sup>-1</sup> ·d <sup>-1</sup> |                   |                   |                    |                    |                    |                   |
|-----------|--------|--------------------|-------------------------|------------------------------------------|-------------------|-------------------|--------------------|--------------------|--------------------|-------------------|
|           |        |                    |                         | PFOA <sup>3</sup>                        | PFNA <sup>4</sup> | PFOS <sup>5</sup> | PFHpA <sup>4</sup> | PFHxA <sup>4</sup> | PFHxS <sup>4</sup> | PFBS <sup>4</sup> |
| 3~6       | male   | 19.63              | 1.08                    | 200                                      | 4150              | 150               | 100000             | 100000             | 5000               | 500000            |
|           | female | 18.65              | 1.08                    | 200                                      | 4150              | 150               | 100000             | 100000             | 5000               | 500000            |
| 7~11      | male   | 33.84              | 1.24                    | 200                                      | 4150              | 150               | 100000             | 100000             | 5000               | 500000            |
|           | female | 31.94              | 1.24                    | 200                                      | 4150              | 150               | 100000             | 100000             | 5000               | 500000            |
| 12~16     | male   | 55.16              | 1.73                    | 200                                      | 4150              | 150               | 100000             | 100000             | 5000               | 500000            |
|           | female | 49.44              | 1.73                    | 200                                      | 4150              | 150               | 100000             | 100000             | 5000               | 500000            |
| 17~19     | male   | 63.43              | 2.26                    | 200                                      | 4150              | 150               | 100000             | 100000             | 5000               | 500000            |
|           | female | 52.67              | 2.26                    | 200                                      | 4150              | 150               | 100000             | 100000             | 5000               | 500000            |
| 20~24     | male   | 67.20              | 2.81                    | 200                                      | 4150              | 150               | 100000             | 100000             | 5000               | 500000            |
|           | female | 53.80              | 2.81                    | 200                                      | 4150              | 150               | 100000             | 100000             | 5000               | 500000            |
| 25~59     | male   | 70.77              | 2.81                    | 200                                      | 4150              | 150               | 100000             | 100000             | 5000               | 500000            |
|           | female | 58.37              | 2.81                    | 200                                      | 4150              | 150               | 100000             | 100000             | 5000               | 500000            |
| >60       | male   | 67.10              | 2.81                    | 200                                      | 4150              | 150               | 100000             | 100000             | 5000               | 500000            |
|           | female | 59.45              | 2.81                    | 200                                      | 4150              | 150               | 100000             | 100000             | 5000               | 500000            |

**Table S7** Total variances in PCA of PFAAs for lakes and reservoirs in Shandong Province of eastern China in the wet season

| Component | Initial eigenvalue |                  |                | Quadratic sum of extracted loading |                  |                | Quadratic sum of rotated loading |                  |                |
|-----------|--------------------|------------------|----------------|------------------------------------|------------------|----------------|----------------------------------|------------------|----------------|
|           | Aggregate          | Variance percent | Cumulative (%) | Aggregate                          | Variance percent | Cumulative (%) | Aggregate                        | Variance percent | Cumulative (%) |
| 1         | 4.754              | 67.921           | 67.921         | 4.754                              | 67.921           | 67.921         | 4.006                            | 57.223           | 57.223         |
| 2         | 1.083              | 15.464           | 83.386         | 1.083                              | 15.464           | 83.386         | 1.831                            | 26.163           | 83.386         |

**Table S8** Rotated factor loading matrix in PCA of PFAAs in lakes and reservoirs from the lower reaches of the Yellow River in the wet season and dry season

| PFAAs | Wet season |          | Dry season |          |          |
|-------|------------|----------|------------|----------|----------|
|       | Factor 1   | Factor 2 | Factor 1   | Factor 2 | Factor 3 |
| PFOA  | 0.882      | -0.148   | 0.104      | 0.104    | 0.379    |
| PFNA  | 0.846      | 0.285    | 0.157      | 0.251    | -0.051   |
| PFOS  | 0.551      | 0.720    | -0.242     | 0.899    | 0.005    |
| PFHxA | 0.847      | 0.360    | 0.324      | -0.191   | 0.034    |
| PFHxS | 0.056      | 0.908    | -0.112     | -0.019   | 0.795    |
| PFHpA | 0.892      | 0.382    | 0.257      | 0.030    | -0.016   |
| PFBS  | 0.832      | 0.332    | 0.380      | -0.309   | -0.259   |

**Table S9** Total variances in PCA of PFAAs for lakes and reservoirs in Shandong Province of eastern China in the dry season

| Component | Initial eigenvalue |                  |                | Quadratic sum of extracted loading |                  |                | Quadratic sum of rotated loading |                  |                |
|-----------|--------------------|------------------|----------------|------------------------------------|------------------|----------------|----------------------------------|------------------|----------------|
|           | Aggregate          | Variance percent | Cumulative (%) | Aggregate                          | Variance percent | Cumulative (%) | Aggregate                        | Variance percent | Cumulative (%) |
| 1         | 3.971              | 56.731           | 56.731         | 3.971                              | 56.731           | 56.731         | 3.418                            | 48.835           | 48.835         |
| 2         | 1.236              | 17.653           | 74.384         | 1.236                              | 17.653           | 74.384         | 1.343                            | 19.190           | 68.025         |
| 3         | 0.817              | 11.672           | 86.056         | 0.817                              | 11.672           | 86.056         | 1.262                            | 18.031           | 86.056         |

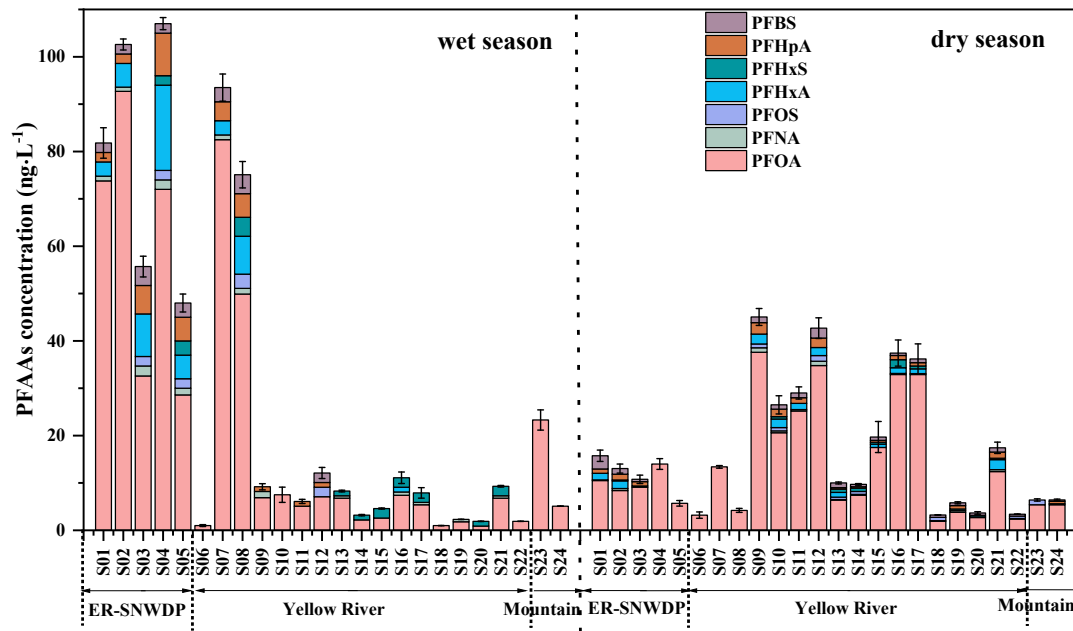

**Fig. S1** Concentration profiles of PFAAs in the 24 lakes and reservoirs for the wet season and dry season

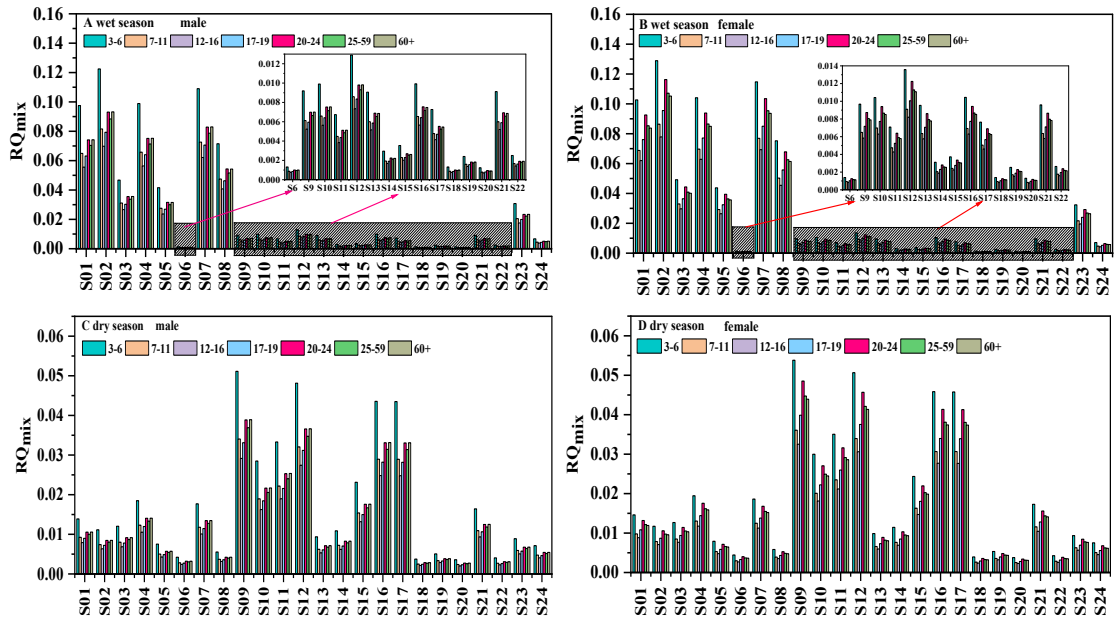

**Fig. S2**  $RQ_{mix}$  values for  $\Sigma$ PFAs related to drinking water intake for male (A) and female (B) in the wet season and male (C) and female (D) in the dry season for all sampling sites

## Reference

- 1 INPMFB (2014) National Physical Fitness Monitoring Bulletin in China.  
<https://www.sport.gov.cn/n315/n329/c216784/content.html>,2015-11-25.
- 2 EPA (2011) Exposure Factors Handbook: 2011 Edition (EPA/600/R-09/052F). <https://cfpub.epa.gov/ncea/risk/recordisplay.cfm?deid=236252>,2011-10-03.
- 3 F. Riva, S. Castiglioni, E. Fattore, A. Manenti, E. Davoli, E. Zuccato, Monitoring emerging contaminants in the drinking water of Milan and assessment of the human risk, *Int. J. Hyg. Environ. Health.*, 2018, 221(3), 451-457.
- 4 T. G. Schwanz, M. Llorca, M. Farré, D. Barcelo, Perfluoroalkyl substances assessment in drinking waters from Brazil, France and Spain, *Sci. Total. Environ.*, 2016, 539, 143-152.
- 5 EFSA (2008) Perfluorooctane sulfonate (PFOS), perfluorooctanoic acid (PFOA) and their salts scientific opinion of the panel on contaminants in the food chain.
